# Supplementary material for: Relationships of gut microbiota, short-chain fatty acids, inflammation, and the gut barrier in Parkinson’s disease
Source: PubMed Central journal article supplement (PMC7869249; doi:10.1186/s13024-021-00427-6), 2021-02-08

**A**

|                              | Alpha diversity     |                             | Beta diversity |
|------------------------------|---------------------|-----------------------------|----------------|
|                              | Pearson for Shannon | Pearson for Inverse Simpson |                |
| UPDRS IV total               | 0.002               | <0.001                      | 0.001          |
| UPDRS III total              | 0.002               | <0.001                      | <0.001         |
| UPDRS II total               | 0.009               | 0.002                       | 0.001          |
| UPDRS I total                | 0.039               | 0.096                       | 0.523          |
| Tremor score poletti         | 0.048               | 0.004                       | 0.058          |
| Tremor score jankovic        | 0.049               | 0.006                       | 0.123          |
| Tremor by pigd jankovic      | 0.133               | 0.034                       | 0.329          |
| Tremor by ar poletti         | 0.829               | 0.421                       | 0.901          |
| Time from nms onset          | 0.161               | 0.129                       | 0.068          |
| Time from motor onset        | 0.651               | 0.587                       | 0.174          |
| Pigd score jankovic          | 0.032               | 0.006                       | 0.010          |
| Meds MAO inhibitor           | 0.160               | 0.180                       | 0.971          |
| Meds dopamine agonist        | 0.068               | 0.063                       | 0.023          |
| Meds dopa                    | 0.474               | 0.127                       | 0.026          |
| Meds COMT inhibitor          | 0.756               | 0.477                       | <0.001         |
| Hoehn and Yahr               | 0.023               | 0.006                       | 0.082          |
| Akinetic rigid score poletti | 0.008               | 0.002                       | 0.005          |
| Age NMS onset                | 0.920               | 0.773                       | 0.093          |
| Age motor symptoms onset     | 0.312               | 0.396                       | 0.195          |

**B**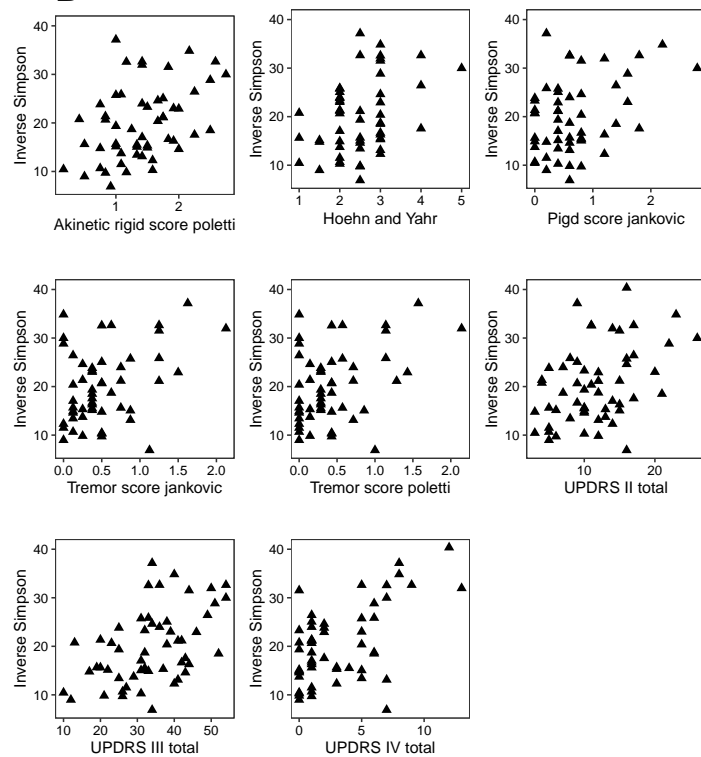**C**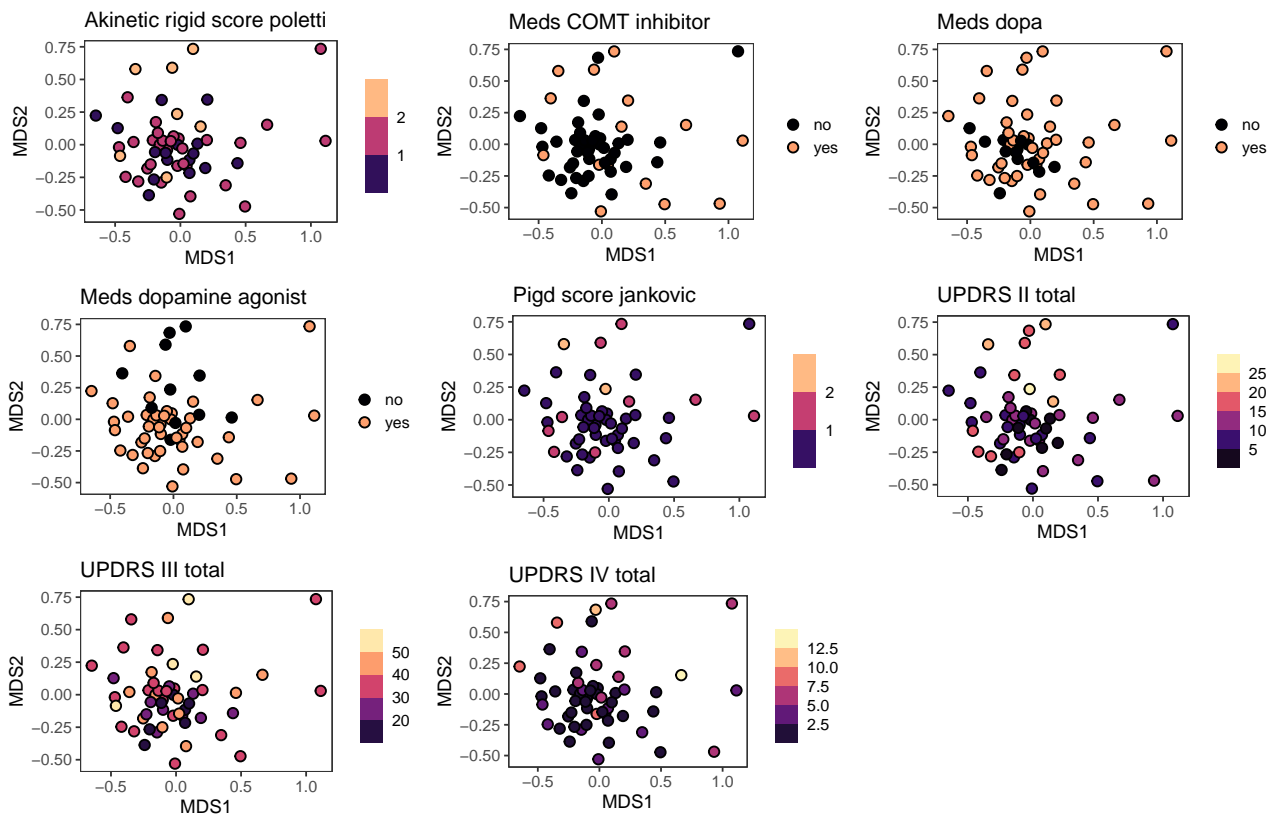

Supplement: 13024_2021_427_MOESM5_ESM.pdf [file 13024_2021_427_MOESM5_ESM.pdf]
