# Supplementary material for: Relationships of gut microbiota, short-chain fatty acids, inflammation, and the gut barrier in Parkinson’s disease
Source: PubMed Central journal article supplement (PMC7869249; doi:10.1186/s13024-021-00427-6), 2021-02-08

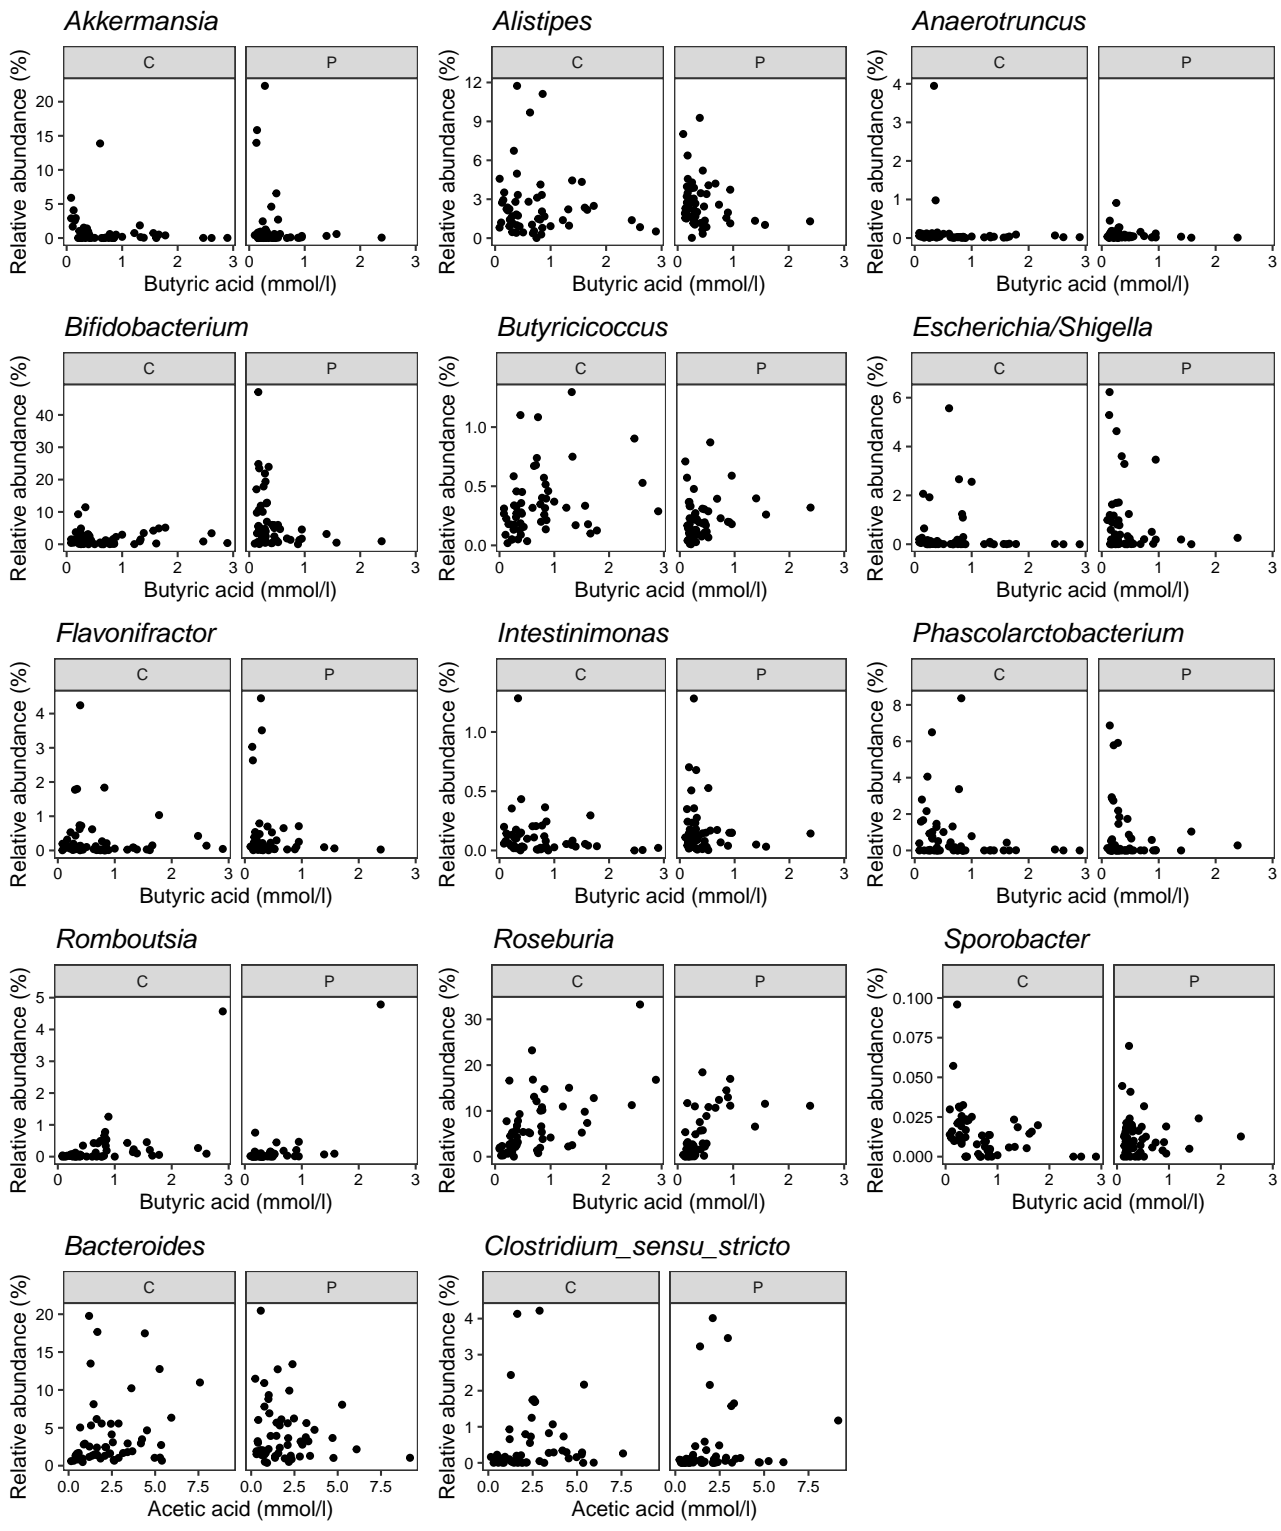

Supplement: 13024_2021_427_MOESM10_ESM.pdf [file 13024_2021_427_MOESM10_ESM.pdf]
