# Supplementary material for: Relationships of gut microbiota, short-chain fatty acids, inflammation, and the gut barrier in Parkinson’s disease
Source: Springer Nature journal article supplement (doi:10.1186/s13024-021-00427-6), 2021-02-08

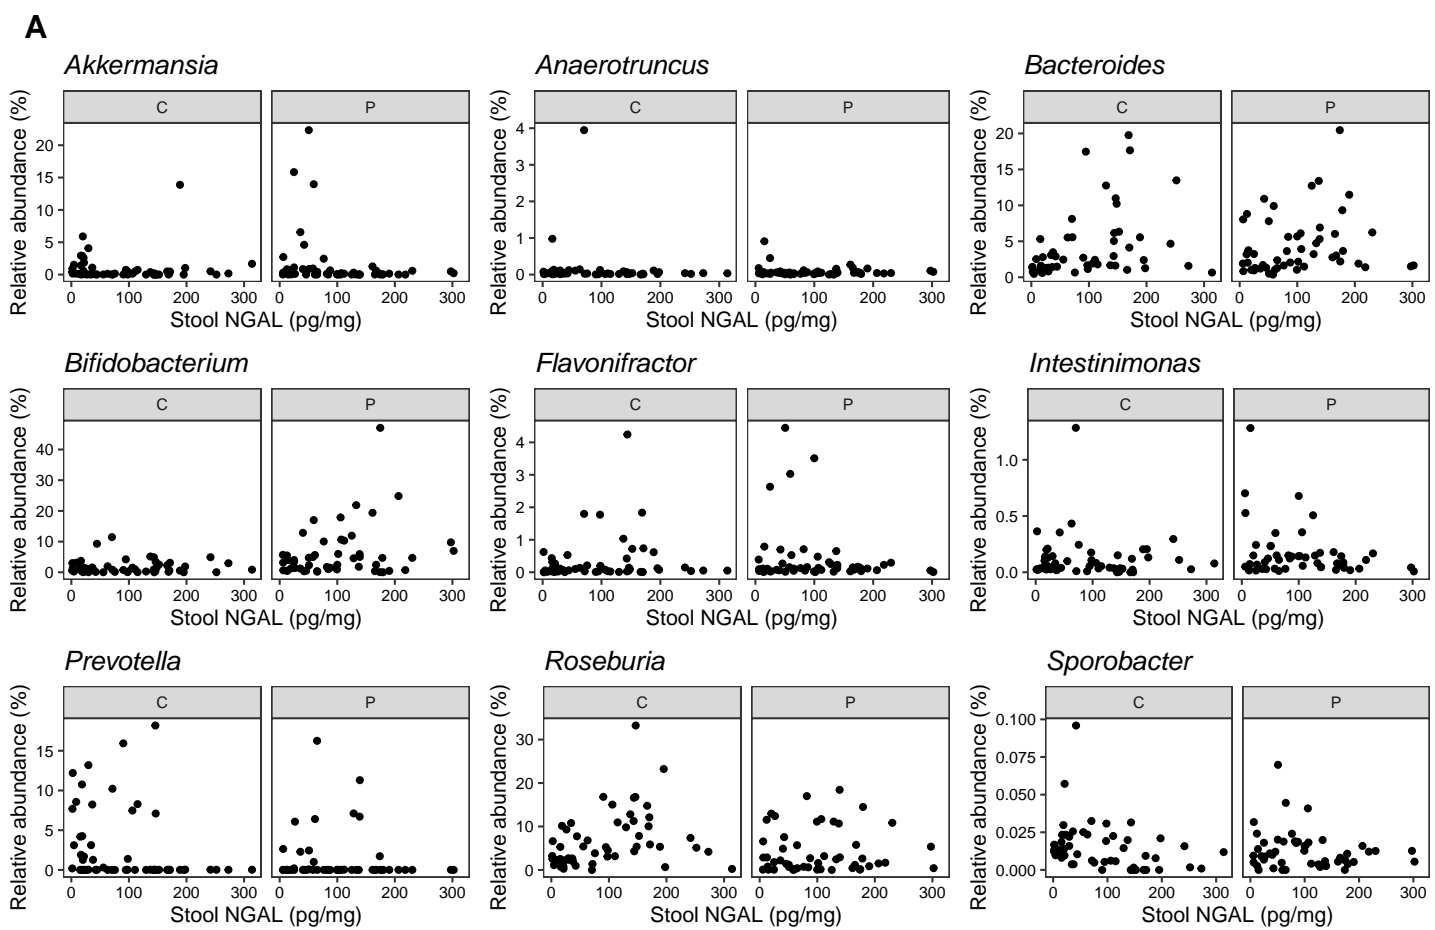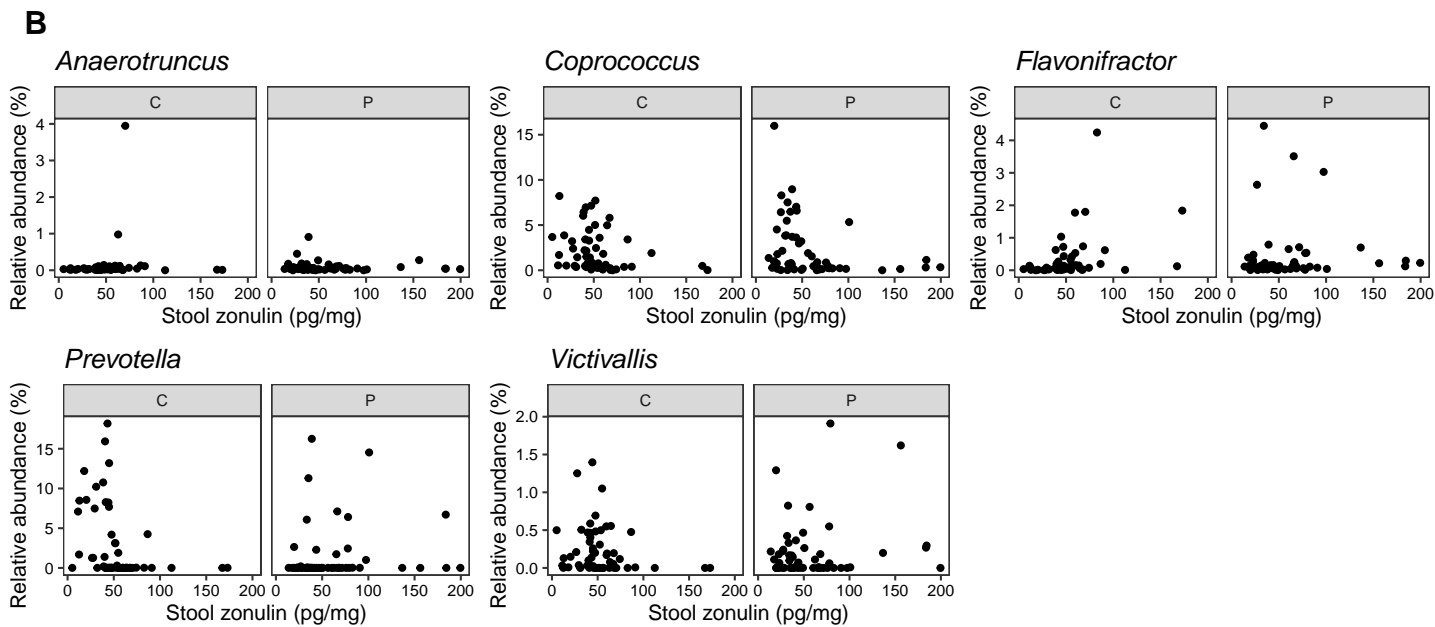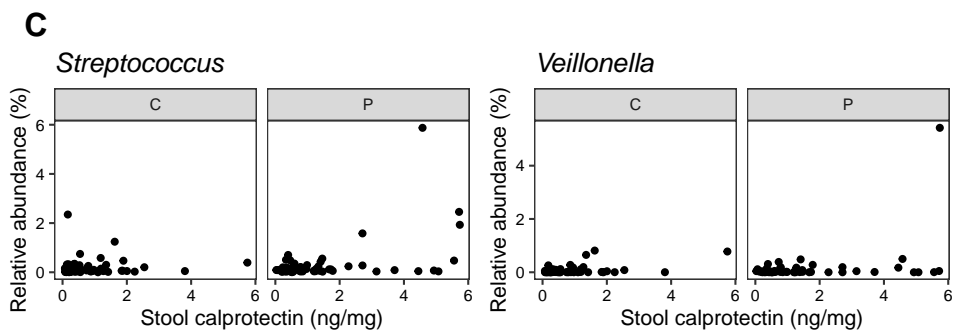

Supplement: MOESM12 [file 18842300]
