# Supplementary material for: Relationships of gut microbiota, short-chain fatty acids, inflammation, and the gut barrier in Parkinson’s disease
Source: Mol Neurodegener. 2021 Feb 8;16:6. doi: 10.1186/s13024-021-00427-6 (PMC7869249; doi:10.1186/s13024-021-00427-6)
Supplement: Supplementary file 13 — Additional file 13: Table summarizing all key results of this study. [file 13024_2021_427_MOESM13_ESM.xlsx]

## Sheet: summary_table
Variable	Different in PD vs controls	Alpha diversity correlation	Beta diversity association	Different between enterotypes	Correlated clinical variables	Inversely correlated clinical variables	Correlated bacterial genera	Inversely correlated bacterial genera
Total SCFAs	no	yes; - (A, C)	yes (A, C)	no	BPS consistency (C), Other GIT surgery (A, P), Diuretics (P), Statins (A, P), Age motor onset (P)	GDS15 (A), NMSS (A, C), Rome III: 9-15 (A, C)	not tested	not tested
Acetic acid	no	yes; - (C)	yes (A, C)	no	BPS consistency (A, C), BPS frequency (P), Hypertension (P), Other GIT surgery (A, P), Beta blockers (P), Diuretics (P), Statins (A, P)	GDS15 (A), NMSS (A, C), Rome III: 9-15 (A, C), Wexner (C)	Bacteroides (C), Butyricicoccus (A, C), Clostridium sensu stricto (A, P), Romboutsia (A, C, P), Roseburia (A, C)	Akkermansia (A, C, P), Anaerotruncus (A, C), Escherichia/Shigella (A, C), Flavonifractor (A, P), Intestinimonas (C), Phascolarctobacterium (C), Sporobacter (C)
Propionic acid	PD: - (A)	yes; - (A, C)	yes (A, C)	yes (A)	Diabetes (P), ACE-AT1 (A), Diuretics (P), Statins (A)	GDS15 (A), NMSS (A, C), Rome III: 9-15 (A)	Butyricicoccus (A, C, P), Romboutsia (A, C, P), Roseburia (A, C, P)	Anaerotruncus (A, C)
Butyric acid	PD: - (A, M)	yes; - (A, C)	yes (A, C, P)	yes (A, P)	Age at sampling (P), BPS consistency (A, C), Other GIT surgery (P), Statins (A, P), Warfarin (P), Age motor onset (P), Age NMS onset (P)	GDS15 (A), NMSQuest (A), NMSS (A), Rome III: 9-15 (A, C), SDQ (A)	Butyricicoccus (A*), Romboutsia (A, C, P), Roseburia (A, C, P)	Akkermansia (A, C), Alistipes (A*), Anaerotruncus (A, C, P), Bifidobacterium (A*, P), Escherichia/Shigella (A, C), Flavonifractor (A*, P), Intestinimonas (A), Phascolarctobacterium (C), Sporobacter (A*, C)
Stool NGAL	no	yes; - (A, C)	yes (A, C)	yes (A, C)	none	none	Bacteroides (A, C), Bifidobacterium (A*, P), Roseburia (C)	Akkermansia (P), Anaerotruncus (A, C), Flavonifractor (P), Intestinimonas (P), Prevotella (C), Sporobacter (A)
Stool calprotectin	PD: + (A, F)	yes; - (A, P)	no	no	Diabetes (A, P), Statins (C), PD relative (A), RBDSQ (A)	BPS consistency (A), BPS frequency (A), Rome III: IBS+ (P)	Streptococcus (A, P), Veillonella (A)	none
Stool zonulin	no	yes; - (A, C)	yes (A, C, P)	yes (C)	ENT surgery (P), Beta blockers (C), Warfarin (C), SDQ (C)	GDS15 (P), NMSQuest (P), NMSS (P), SDQ (P), Akinetic rigid score Poletti (P), Hoehn and Yahr (P), PIGD score Jankovic (P), UPDRS I (P), UPDRS II (P), UPDRS III (P), UPDRS IV (P)	Anaerotruncus (C), Flavonifractor (C)	Coprococcus (A, C, P), Prevotella (C), Victivallis (C)
Stool CXCL8	no	yes; - (P)	no	no	ACE AT1 (C), PD relative (A, P), Ropinirole (mg) (P)	BPS consistency (A, P), BPS frequency (C), Age motor onset (P)	not tested	not tested
Stool IL1b	no	yes; - (A)	no	no	ASA (C), PD relative (A, P), Ropinirole (mg) (P)	BMI (A, P), BPS consistency (A), Age motor onset (P)	not tested	not tested
Stool IL2	no	no	yes (A)	no	PD relative (C), Levodopa IR (mg) (P)	BPS consistency (C)	not tested	not tested
Stool PC	no	no	yes (A)	no	BPS consistency (C)	PD relative (A, C), Levodopa IR (mg) (P)	not tested	not tested
Plasma CXCL8	PD: - (A, F)	no	no	no	BMI (P), TIA/stroke (A), Diuretics (A, P), Tremor by AR Poletti (P)	Hypercholesterolemia (C), NMSQuest (A), NMSS (A), RLS (A), Rome III: 9-15 (A, C), Rome III: IBS+ (A)	not tested	not tested
Abbreviations for subsets: A: all samples, M: only males, F: only females, C: only control subjects, P: only PD patients, A*: all samples without confounder correction in differential abundance comparisons
Abbreviations for clinical variables: BPS: Bowel Performance Scale, GIT: gastrointestinal tract, NMS: Non-Motor Symptoms, ENT: Ear, Nose and Throat, RBDSQ: REM Sleep Behavior Disorder Screening Questionnaire, SDQ: Swallowing Disturbance Questionnaire, ASA: acetylsalicylic acid, BMI: body mass index, AR: akinetic-rigid, GDS: Geriatric Depression Scale, NMSS: non-motor symptoms scale, Rome III: IBS…
